# Supplementary material for: Chiral π-Conjugated Liquid Crystals: Impacts of Ethynyl Linker and Bilateral Symmetry on the Molecular Packing and Functions
Source: MDPI journal article supplement (doi:10.3390/cryst12091278), 2022-09-09
Supplement: s1 [file s1]

---

## Supporting Information

### Table of contents

#### S-1. Synthetic procedure

#### S-2. $^1\text{H}$ and $^{13}\text{C}$ NMR spectra

#### S-3. High resolution ESI mass spectra

### S-1. Synthetic procedure

#### S1.1. Synthesis of (R)-1

##### 5-Octyl-5''-[3-fluoro-4-{(R)-2-octyloxy}phenyl]-2,2':5',2''-terthiophene: (R)-1

To a stirred solution of (R)-5 (1.12 g, 2.40 mmol, 1.00 eq.), **4** (968 mg, 3.00 mmol, 1.25 eq.) and  $\text{Pd}(\text{PPh}_3)_4$  (112 mg, 0.097 mmol, 0.04 eq.) in dry THF (55 mL) was added  $\text{K}_2\text{CO}_3$  aqueous solution (2.0 M, 36.0 mL, 72 mmol, 30 eq.) under argon atmosphere. The reaction mixture was refluxed for 8 hours. After cooling to room temperature,  $\text{H}_2\text{O}$  (50 mL) was added. The product was extracted with *n*-hexane (100 mL). The organic layer was washed with brine (50 mL) and water (50 mL). The aqueous layer was extracted with *n*-hexane (50 mL  $\times$  3) and all organic layers were combined. The extract was dried over  $\text{Na}_2\text{SO}_4$ . After filtration and evaporation, the crude product was purified by silica gel column chromatography (eluent: *n*-hexane/toluene = 10/1  $\rightarrow$  5/1; v/v). The product was recrystallized from *n*-hexane and dried *in vacuo* to afford (R)-1 as a yellow solid (1.03 g, 2.01 mmol, 74% yield).

#### S1.2. Synthesis of (R)-2

---

#### 5-Octyl-5''-(3-fluoro-4-[(*R*)-2-octyloxy]phenyl)ethynyl)-2,2':5',2''-terthiophene: (*R*)-2

To a stirred solution of **6** (700 mg, 1.59 mmol, 1.00 eq.), (*R*)-**7** (514 mg, 2.07 mmol, 1.30 eq.), CuI (30 mg, 0.08 mmol, 0.05 eq.), and Pd(PPh<sub>3</sub>)<sub>4</sub> (184 mg, 0.16 mmol, 0.10 eq.) in dry THF (50 mL) was added triethylamine (50 mL) under argon atmosphere. The reaction mixture was refluxed for 43 hours. After cooling to room temperature, the reaction mixture was filtrated to remove the insoluble residue. The solvents were removed from the filtrate by vacuum evaporation. Then, the resultant residue was purified by silica gel column chromatography (eluent: *n*-hexane/toluene = 10/1→5/1; v/v). The product was recrystallized from *n*-hexane with small amount of methanol, and dried *in vacuo* to afford (*R*)-**2** as a yellow solid (490 mg, 0.81 mmol, 51 % yield).

#### S1.3. Synthesis of (*R*)-3

##### 5,5'-Bis(3-fluoro-4-[(*R*)-2-octyloxy]phenyl)ethynyl)-2,2'-bithiophene: (*R*)-3

To a stirred solution of **8** (650 mg, 2.00 mmol, 1.00 eq.), (*R*)-**7** (1.24 g, 5.00 mmol, 2.50 eq.), CuI (76 mg, 0.40 mmol, 0.20 eq.) and Pd(PPh<sub>3</sub>)<sub>4</sub> (280 mg, 0.40 mmol, 0.20 eq.) in dry THF (50 mL) was added triethylamine (50 mL) under argon atmosphere. The reaction mixture was refluxed for 69 hours. After cooling to room temperature, the reaction mixture was filtrated to remove the insoluble residue. The solvents were removed from the filtrate by vacuum evaporation. Then, the resultant residue was purified by silica gel column chromatography (eluent: *n*-hexane/toluene = 10/1→5/1; v/v). The product was recrystallized from *n*-hexane with small amount of methanol. After drying *in vacuo*, the desired compound (*R*)-**3** was obtained as a yellow solid (560 mg, 0.85 mmol, 42 % yield).

## S-2. <sup>1</sup>H and <sup>13</sup>C NMR spectra

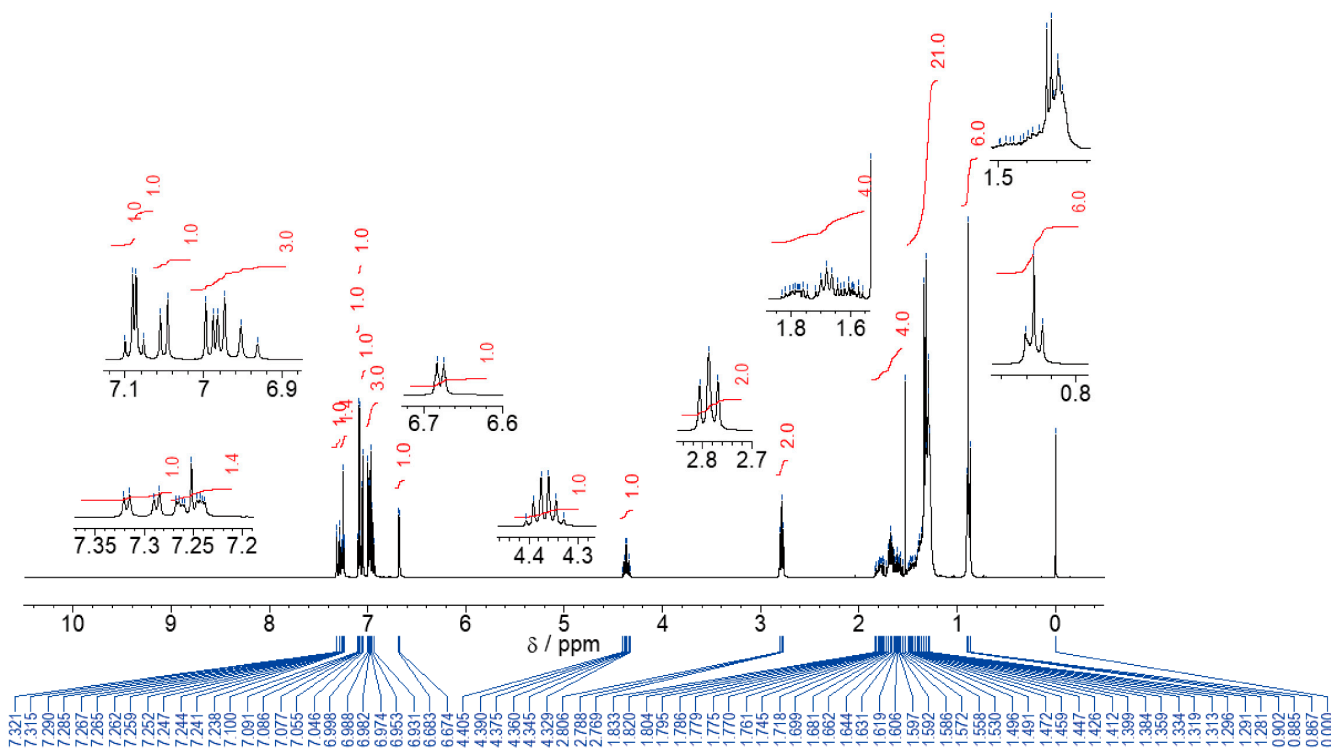

**Figure S1.**  $^1\text{H}$  NMR spectrum of (*R*)-1.

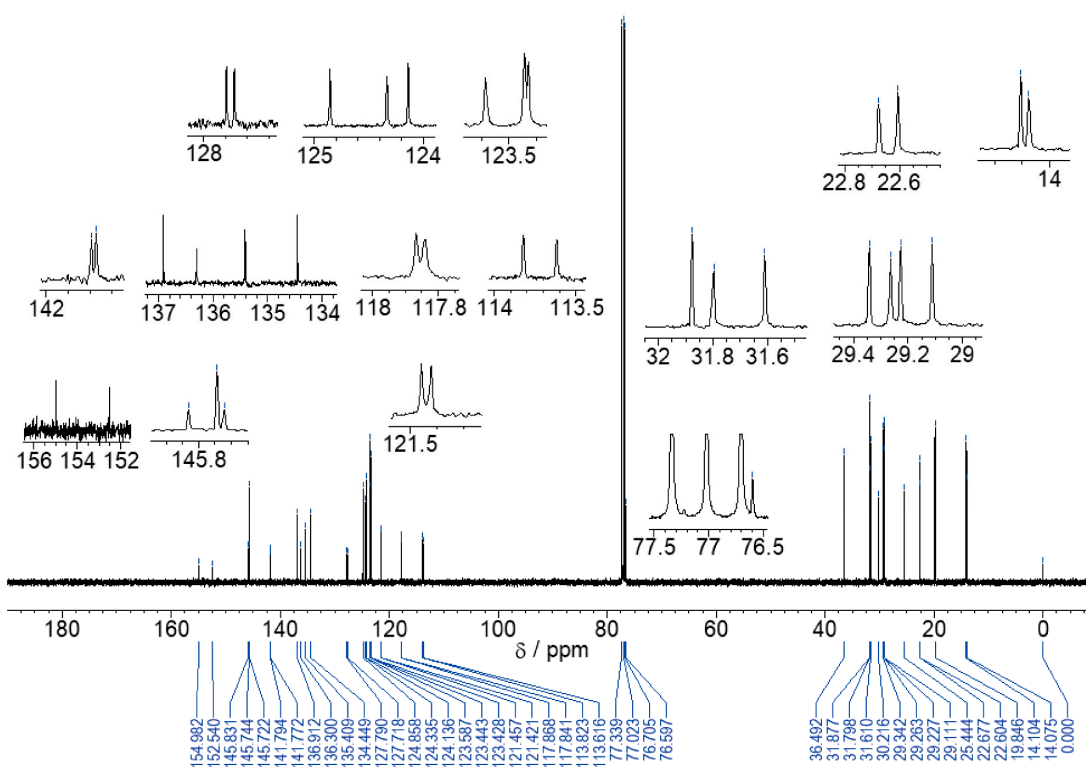

**Figure S2.**  $^{13}\text{C}$  NMR spectrum of (*R*)-1.

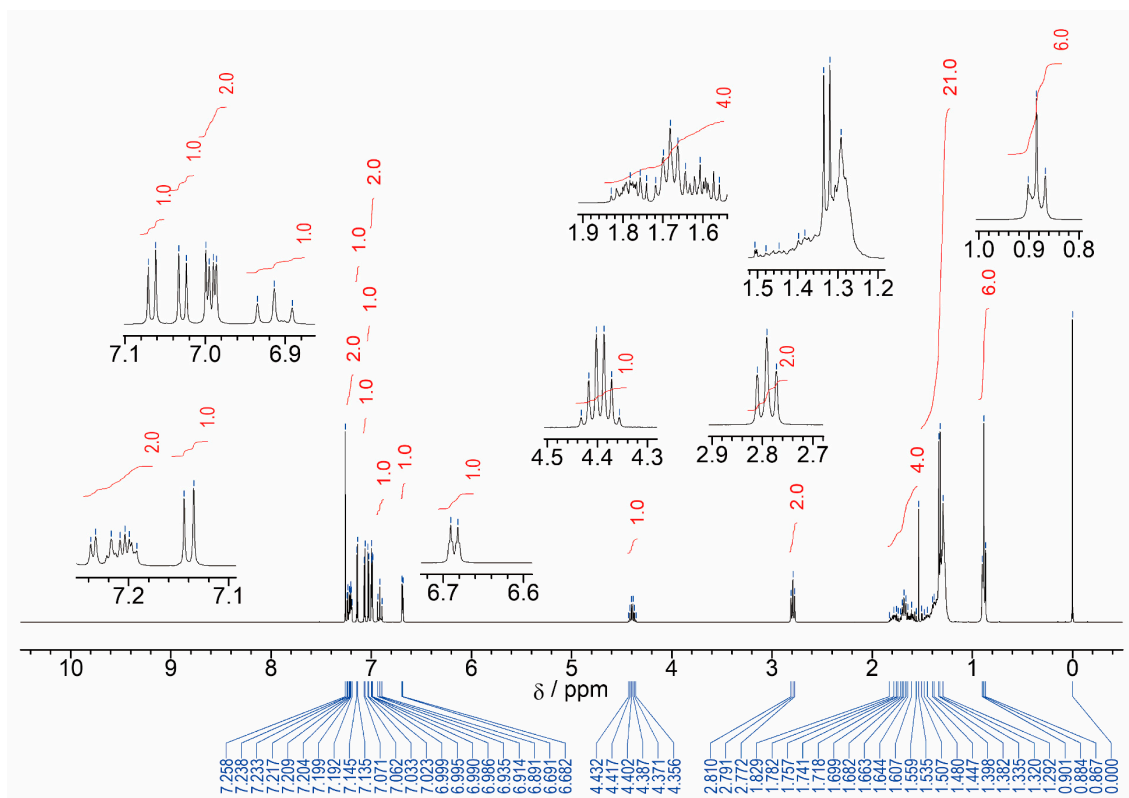

**Figure S3.** <sup>1</sup>H NMR spectrum of (R)-2.

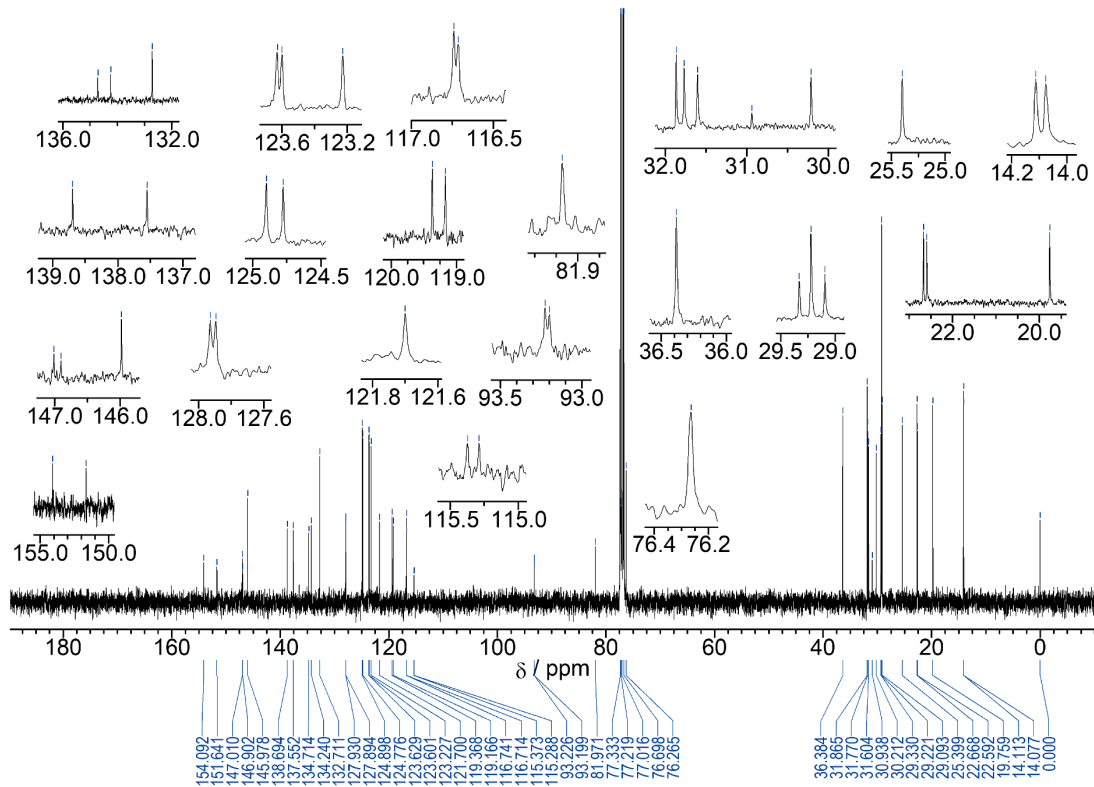

**Figure S4.** <sup>13</sup>C NMR spectrum of (R)-2.

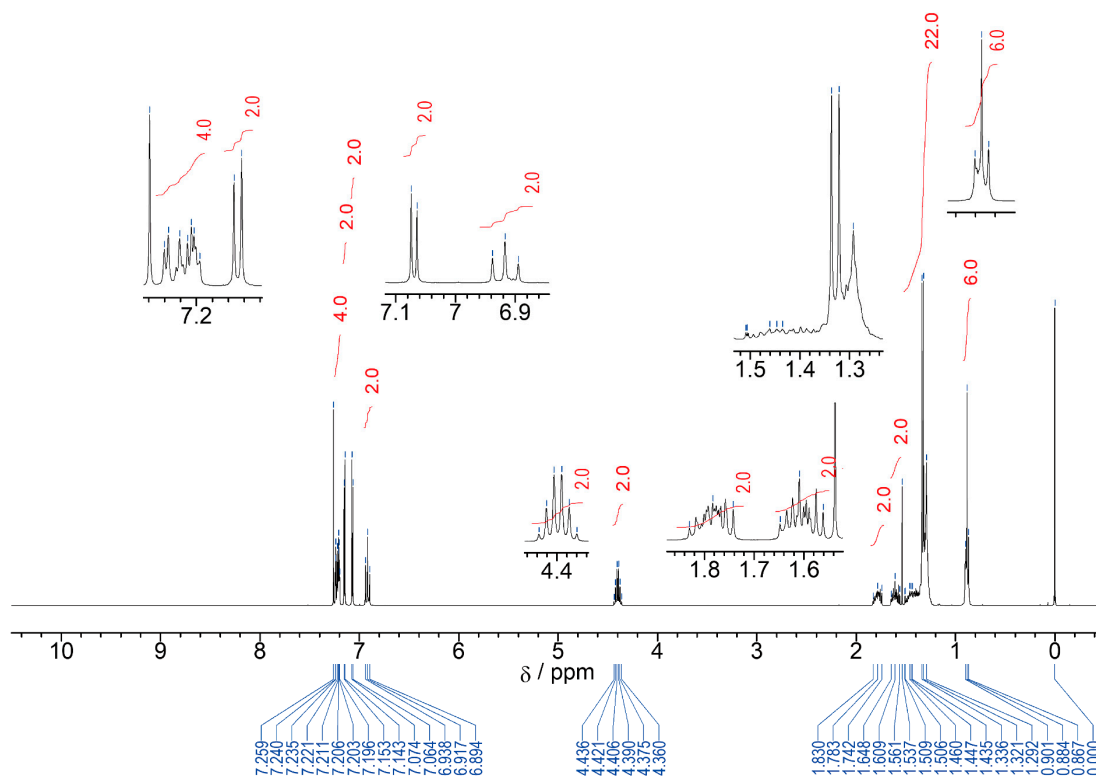

**Figure S5.** <sup>1</sup>H NMR spectrum of (R)-3.

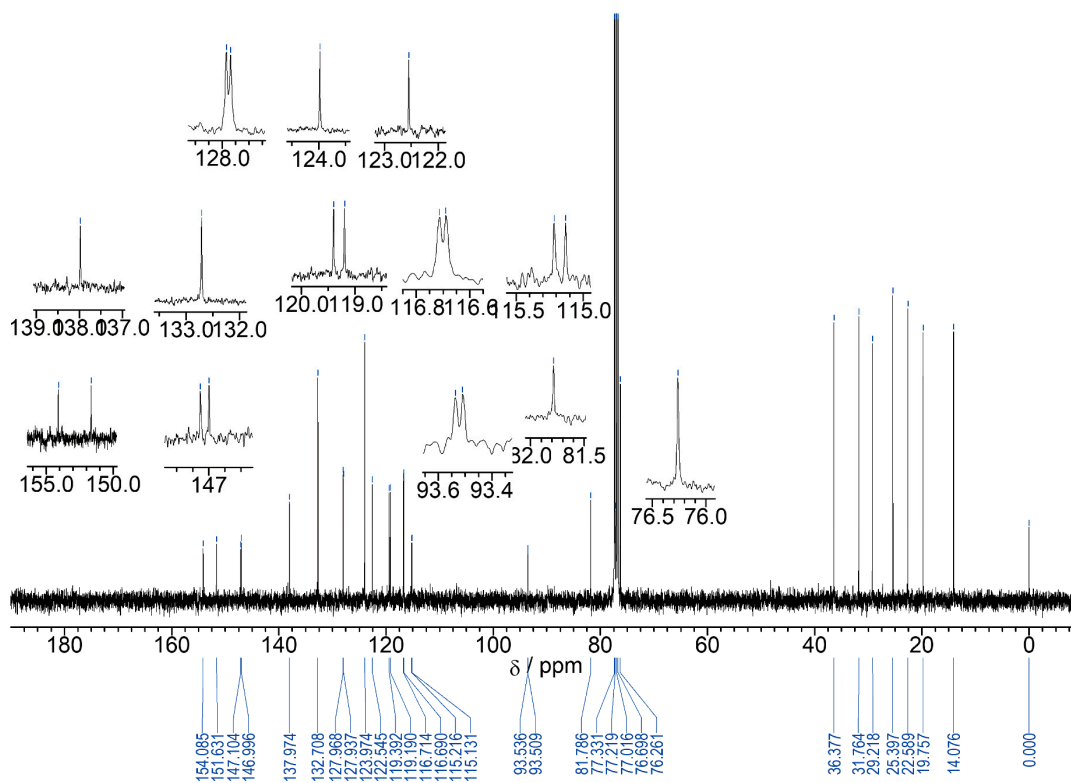

**Figure S6.** <sup>13</sup>C NMR spectrum of (R)-3.

### S-3. High resolution ESI mass spectra

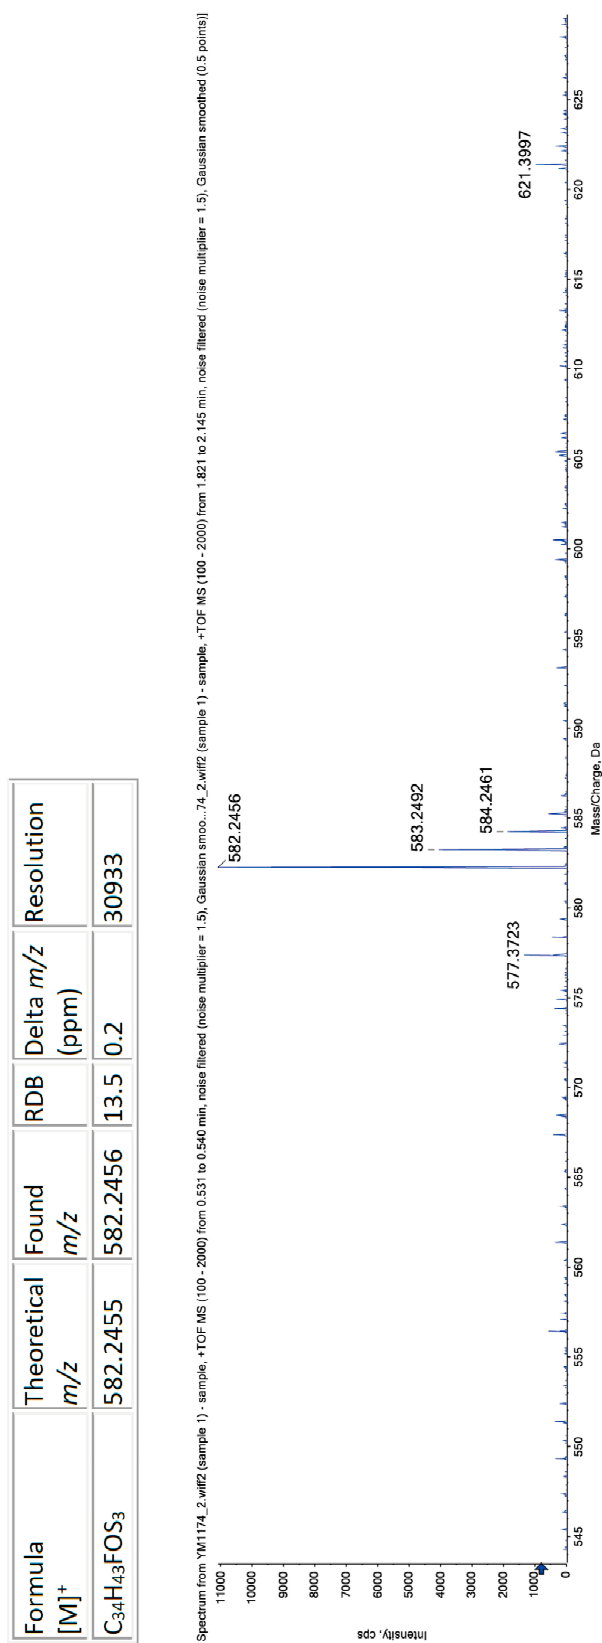

Figure S7. High resolution ESI mass spectrum of (R)-1.

| Formula<br>[M] <sup>+</sup>                      | Theoretical<br>m/z | Found<br>m/z | RDB  | Delta m/z<br>(ppm) | Resolution |
|--------------------------------------------------|--------------------|--------------|------|--------------------|------------|
| C <sub>36</sub> H <sub>43</sub> FOS <sub>3</sub> | 606.2455           | 606.2453     | 15.5 | -0.3               | 27123      |

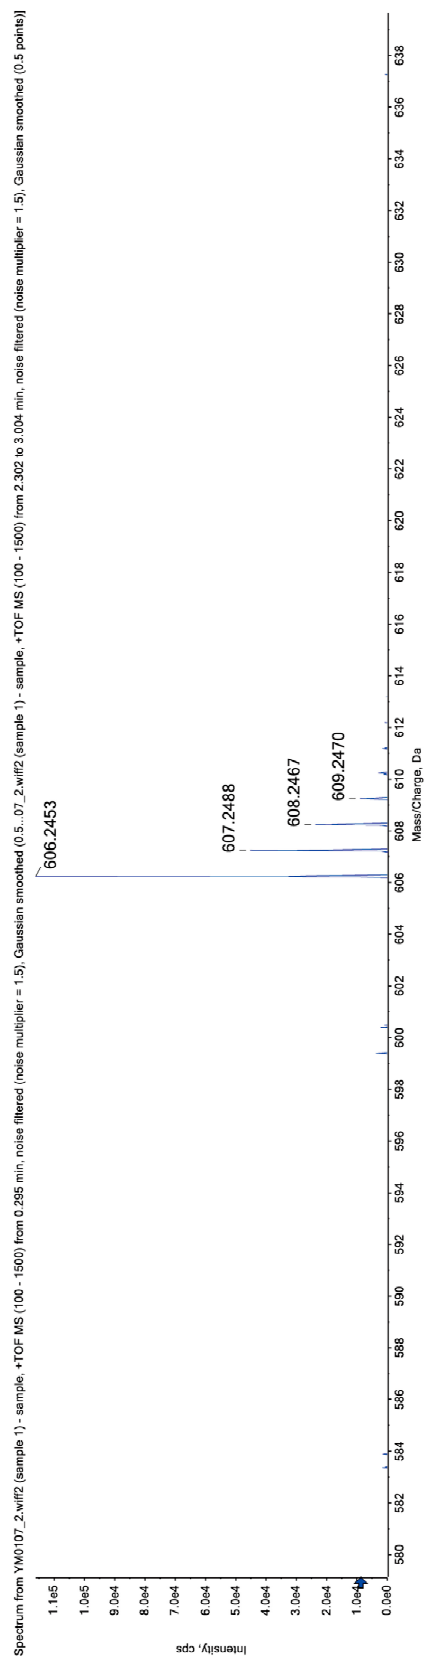

**Figure S8.** High resolution ESI mass spectrum of (*R*)-2.

| Formula                 | Theoretical<br>$m/z$ | Found<br>$m/z$ | RDB  | Delta $m/z$<br>(ppm) | Resolution |
|-------------------------|----------------------|----------------|------|----------------------|------------|
| $[M+H]^+$               |                      |                |      |                      |            |
| $C_{40}H_{45}F_2O_2S_2$ | 659.2824             | 659.2828       | 18.0 | 0.7                  | 26337      |

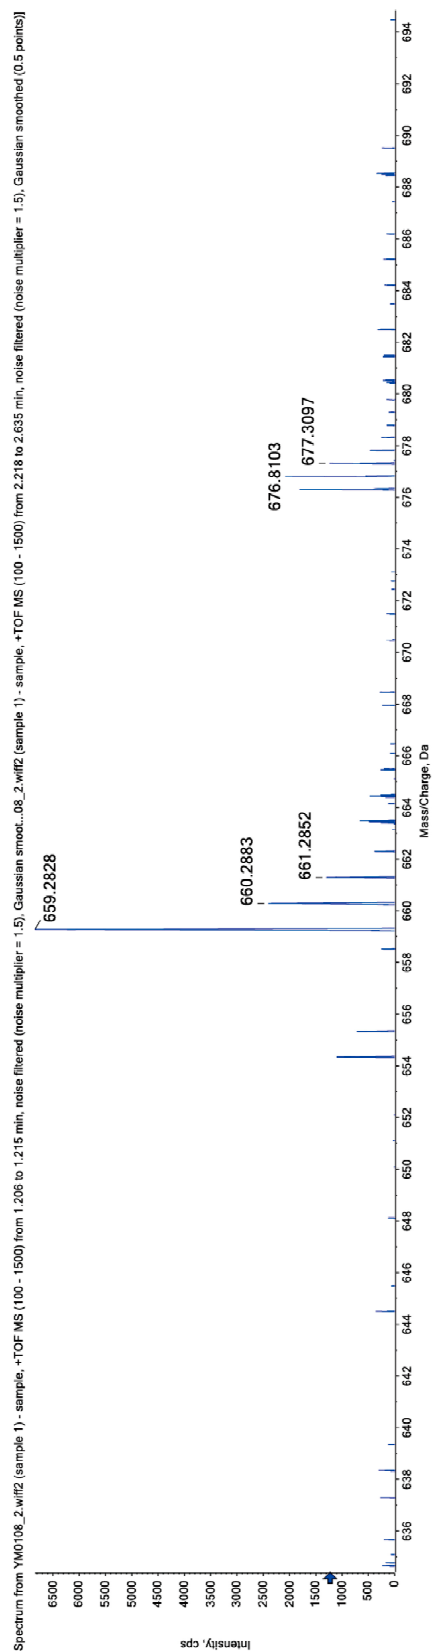

**Figure S9.** High resolution ESI mass spectrum of (*R*)-3.
